# Supplementary material
Source: PubMed Central journal article supplement (PMC3021655)
Supplement: mmc1.pdf [file mmc1.pdf]

Biophysical Journal

## **The Role of Stretching in Slow Axonal Transport**

Matthew O'Toole and Kyle E. Miller

### Supplemental Table S1

| Data for Pfister et al. Comparison           |                                            |         |
|----------------------------------------------|--------------------------------------------|---------|
| Parameter                                    | Value                                      | Source  |
| Length of Tubulin Dimer                      | .008 $\mu\text{m}$                         | (†)     |
| Dimers / $\mu\text{m}$ of micro-tubule       | 13/.008 = 1625                             | derived |
| Tubulin in Soluble Form                      | $\approx 30\%$                             | (‡)     |
| MT Density (0 days)                          | 153 MT $\mu\text{m}^{-2}$                  | (*)     |
| Axonal Caliber (0 days)                      | .43 $\mu\text{m}^2$                        | (*)     |
| Approximate MT Density (0 days)              | 66 MT $\mu\text{m}^{-1}$                   | derived |
| Approximate Linear Tubulin Density (0 days)  | 153214 dimers $\mu\text{m}^{-1}$           | derived |
| $\gamma$                                     | 4 mm day $^{-1}$                           | (*)     |
| $\tau$                                       | 73.6 days                                  | (**)    |
| Microtubule Density (14 days)                | 158 MT $\mu\text{m}^{-2}$                  | (*)     |
| Axonal Caliber (14 days)                     | .58 $\mu\text{m}^2$                        | (*)     |
| Approximate Microtubule Density (14 days)    | 92 MT $\mu\text{m}^{-1}$                   | derived |
| Approximate Linear Tubulin Density (14 days) | 213571 dimers $\mu\text{m}^{-1}$           | derived |
| $\alpha$                                     | 4311 dimers $\mu\text{m}^{-1}$ day $^{-1}$ | derived |
| $P_0$ (2 days)                               | 161836 dimers $\mu\text{m}^{-1}$           | derived |
| $L_0$ (2 days)                               | 3.5 mm                                     | (*)     |
| $A$                                          | 84.1                                       | derived |
| $C$                                          | 1.96                                       | derived |

Table 1: Parameters Used for Applying this Model to the Data of Pfister, et al.

(†) : Desai, A., and T. J. Mitchison. 1997. Microtubule polymerization dynamics. Annual review of cell and developmental biology 13:83–117.

(‡) : Morris, J. R., and R. J. Lasek. 1984. Monomer-polymer equilibria in the axon: direct measurement of tubulin and actin as polymer and monomer in axoplasm. The Journal of cell biology 98:2064-2076.

(\*) : Pfister, B. J., A. Iwata, D. F. Meaney, and D. H. Smith. 2004. Extreme stretch growth of integrated axons. J Neurosci 24:7978-7983.

(\*\*) : Miller, K. E., and D. C. Samuels. 1997. The axon as a metabolic compartment: protein degradation, transport, and maximum length of an axon. Journal of theoretical biology 186:373-379.
